# Supplementary material for: Soyasaponin Bb/Gelatin-Methacryloyl Hydrogel for Cartilage Inflammation Inhibition
Source: PubMed Central journal article supplement — ACS Omega. 2024 Dec 4;9(50):49597–608. doi: 10.1021/acsomega.4c07489 (PMC11656367; doi:10.1021/acsomega.4c07489), 2024-12-04
Supplement: ao4c07489_si_001.pdf [file ao4c07489_si_001.pdf]

## Supporting Information

# **Soyasaponin Bb / Gelatin-Methacryloyl hydrogel for cartilage inflammation inhibition**

Yuhan Jiang<sup>1</sup>, Tenghai Li<sup>1</sup>, Bingzhang Liu<sup>1</sup>, Yufeng Tian<sup>1</sup>, Yixin Wang<sup>1</sup>, Tian Li<sup>1,\*</sup>, Duo Zhang<sup>1,\*</sup>

1.Department of Plastic and Reconstructive Surgery, The First Hospital of Jilin University, Changchun 130021, P. R. China

\*Corresponding author. Department of Plastic and Reconstructive Surgery, The First Hospital of Jilin University, Changchun 130021, P. R. China

[litian@jlu.edu.cn](mailto:litian@jlu.edu.cn)( Tian Li )

[zhangduo@jlu.edu.cn](mailto:zhangduo@jlu.edu.cn)( Duo Zhang)

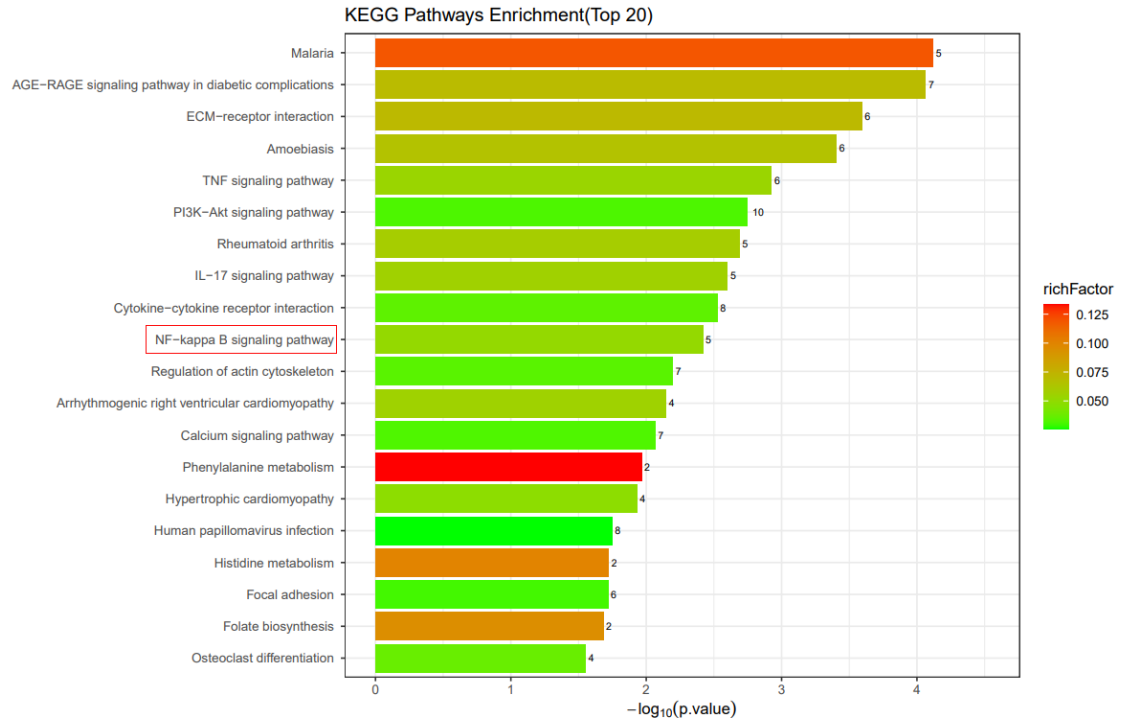

**Figure S1.** The main category terms of KEGG analysis.

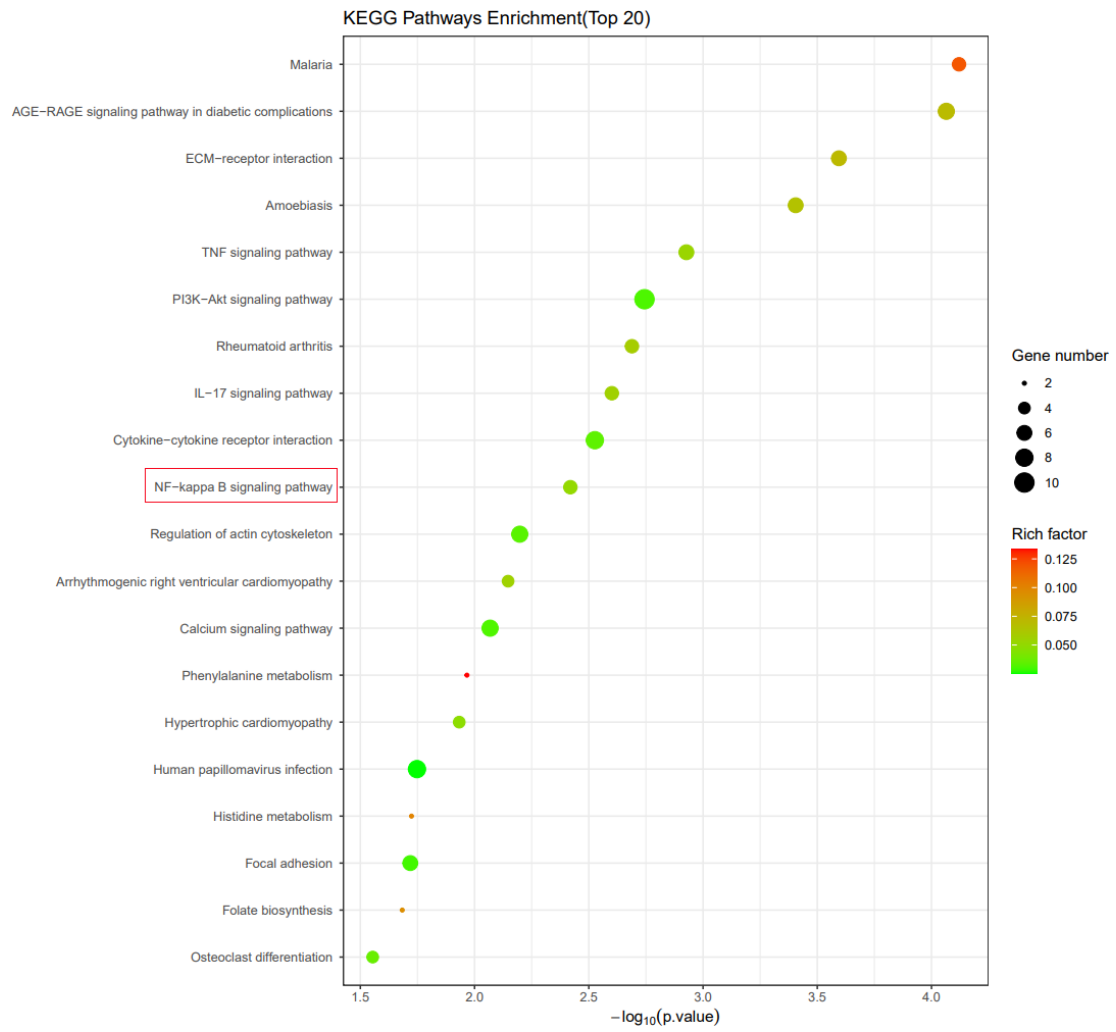

**Figure S2.** KEGG pathway enrichment analysis.

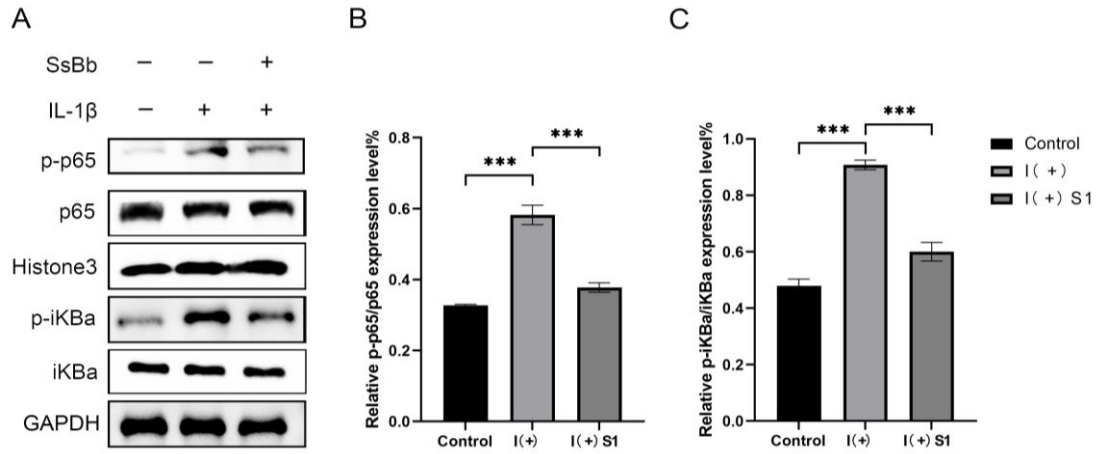

**Figure S3.** SsBb inhibits the activation of NF- $\kappa$ B signaling pathway. The cells were treated with PBS, IL-1 $\beta$  (10 ng/ml) with or without SsBb (1  $\mu$ g/ml). Western blotting analysis of p-p65, p65, p-ikBa and ikBa protein levels after SsBb treatment (A-C).

\*\*\* $p < 0.001$ .
